# Supplementary material for: Enhancing electrical energy storage capability of dielectric polymer nanocomposites via the room temperature Coulomb blockade effect of ultra-small platinum nanoparticles
Source: Royal Society of Chemistry journal article supplement (doi:10.1039/c7cp07990g), 2018-01-01
Supplement: c7cp07990g1.pdf [file c7cp07990g1.pdf]

*Supporting Information*

**Substantially Enhancing Energy Storage Capability of Dielectric Polymer Nanocomposites via Room Temperature Coulomb Blockade Effect of Ultra-Small Platinum Nanoparticles**

**Liwei Wang, Xingyi Huang\*, Yingke Zhu, Pingkai Jiang<sup>†</sup>**

Department of Polymer Science and Engineering, Shanghai Key Laboratory of Electrical Insulation and Thermal Ageing, Shanghai Jiao Tong University, Shanghai 200240, China

\*Corresponding to X.H. (E-mail: xyhuang@sjtu.edu.cn)

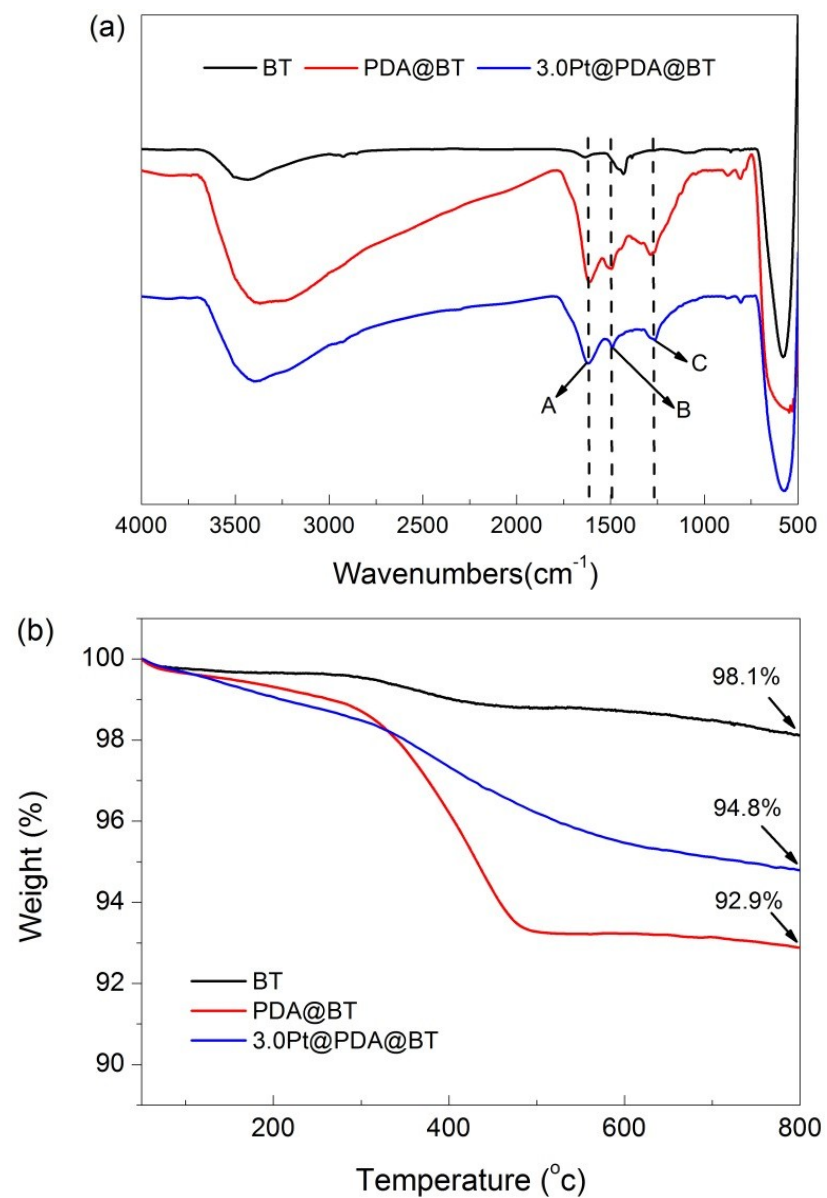

**Figure S1.** FT-IR spectra (a) and TGA curves (b) of BT, PDA@BT and Pt@PDA@BT nanofiller.

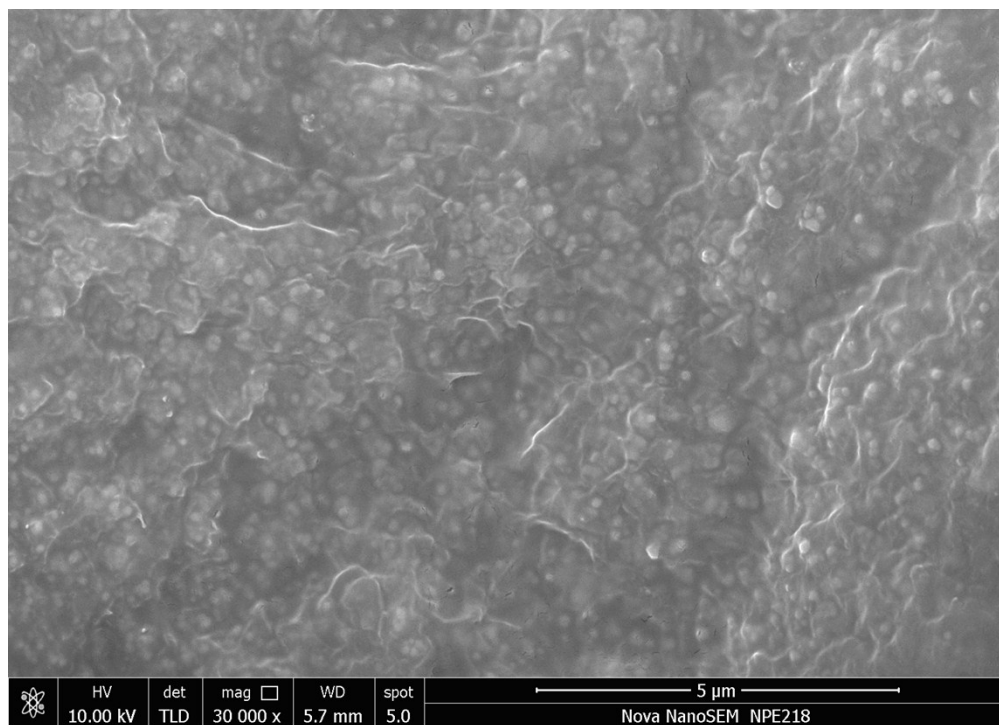

**Figure S2.** SEM images of nanocomposites with 1.0Pt@PDA@BT

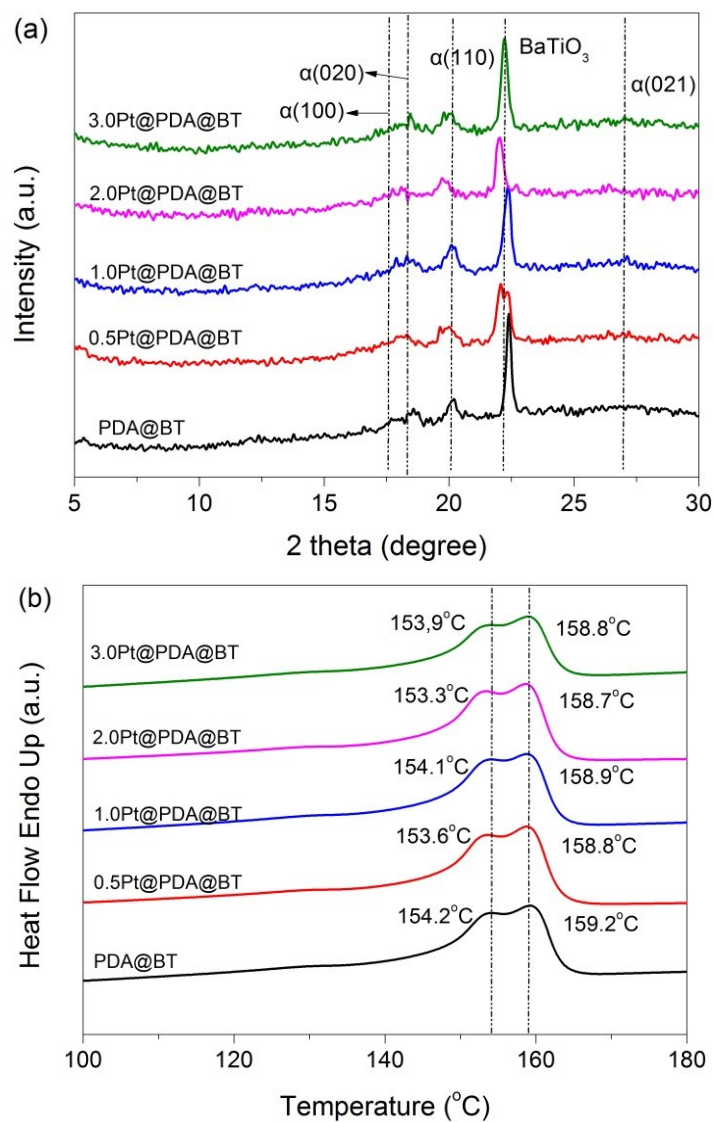

**Figure S3.** XRD and DSC melting curves of the PDA@BT and Pt@PDA@BT nanocomposites.

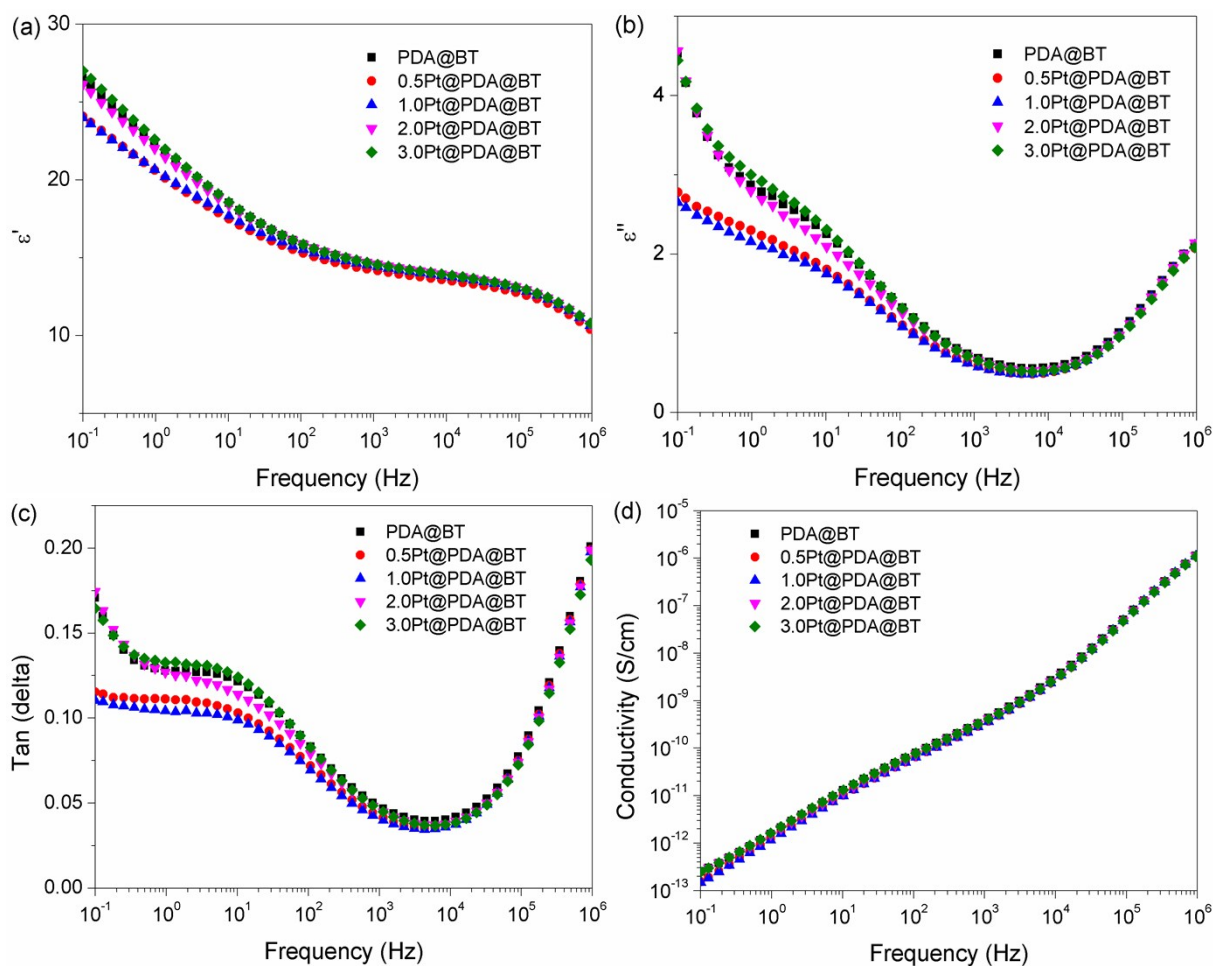

**Figure S4.** The dielectric properties of the PDA@BT and Pt@PDA@BT nanocomposites:  $\epsilon'$ ,  $\epsilon''$ , tan delta, and conductivity;

Figure S4d shows that, regardless of the concentration of the ultra-small Pt particles, the Pt@PDA@BT nanocomposites have comparable frequency dependent electrical conductivity in comparison with the PDA@BT nanocomposites. This may be caused by the low electric field used for dielectric measurement.

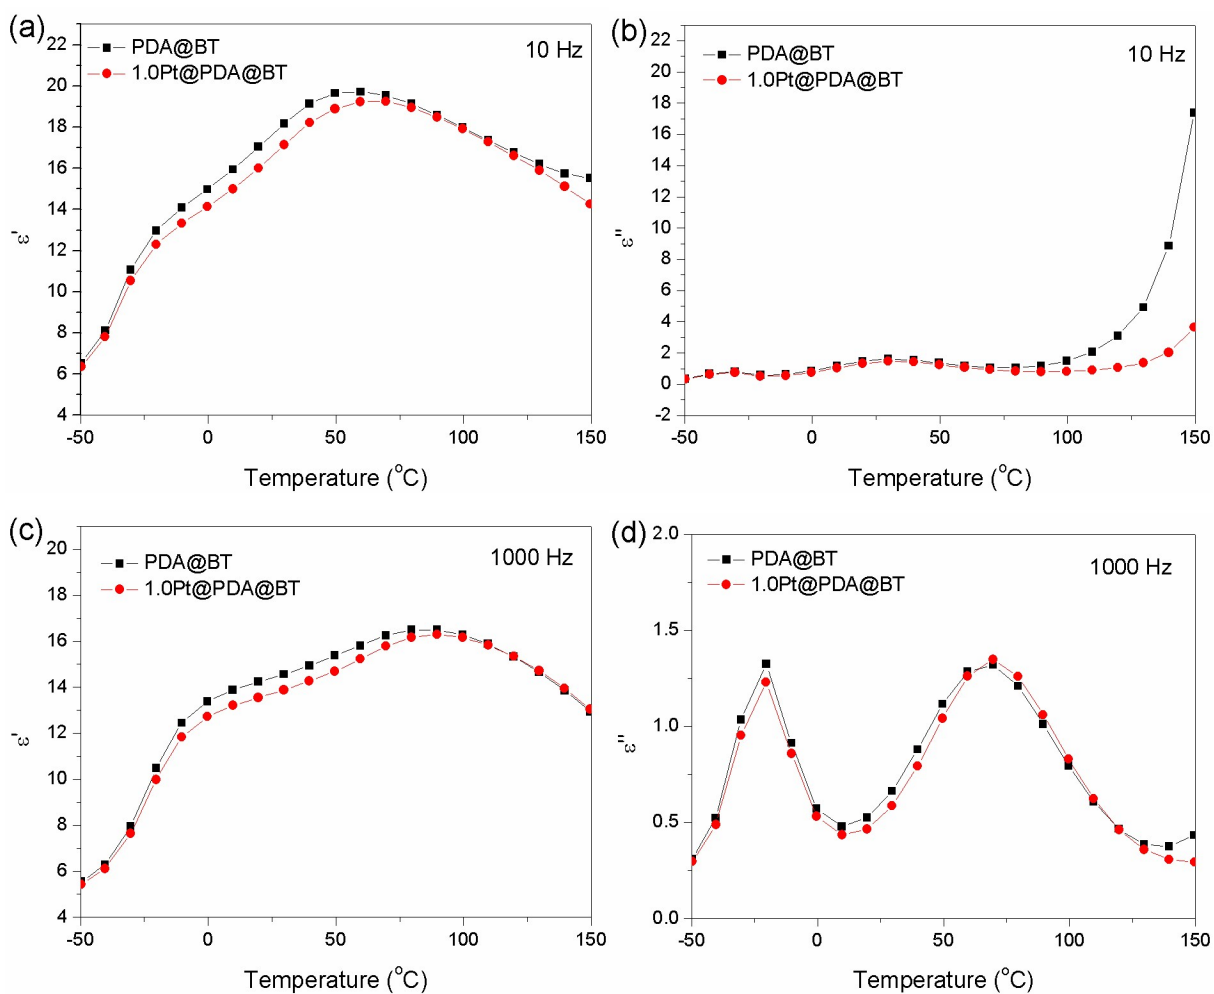

**Figure S5.** Temperature dependent real (a) and imaginary (b) dielectric constant of PDA@BT and 1.0Pt@PDA@BT at 10 Hz; Temperature dependent real (a) and imaginary (b) dielectric constant of PDA@BT and 1.0Pt@PDA@BT at 1000 Hz;

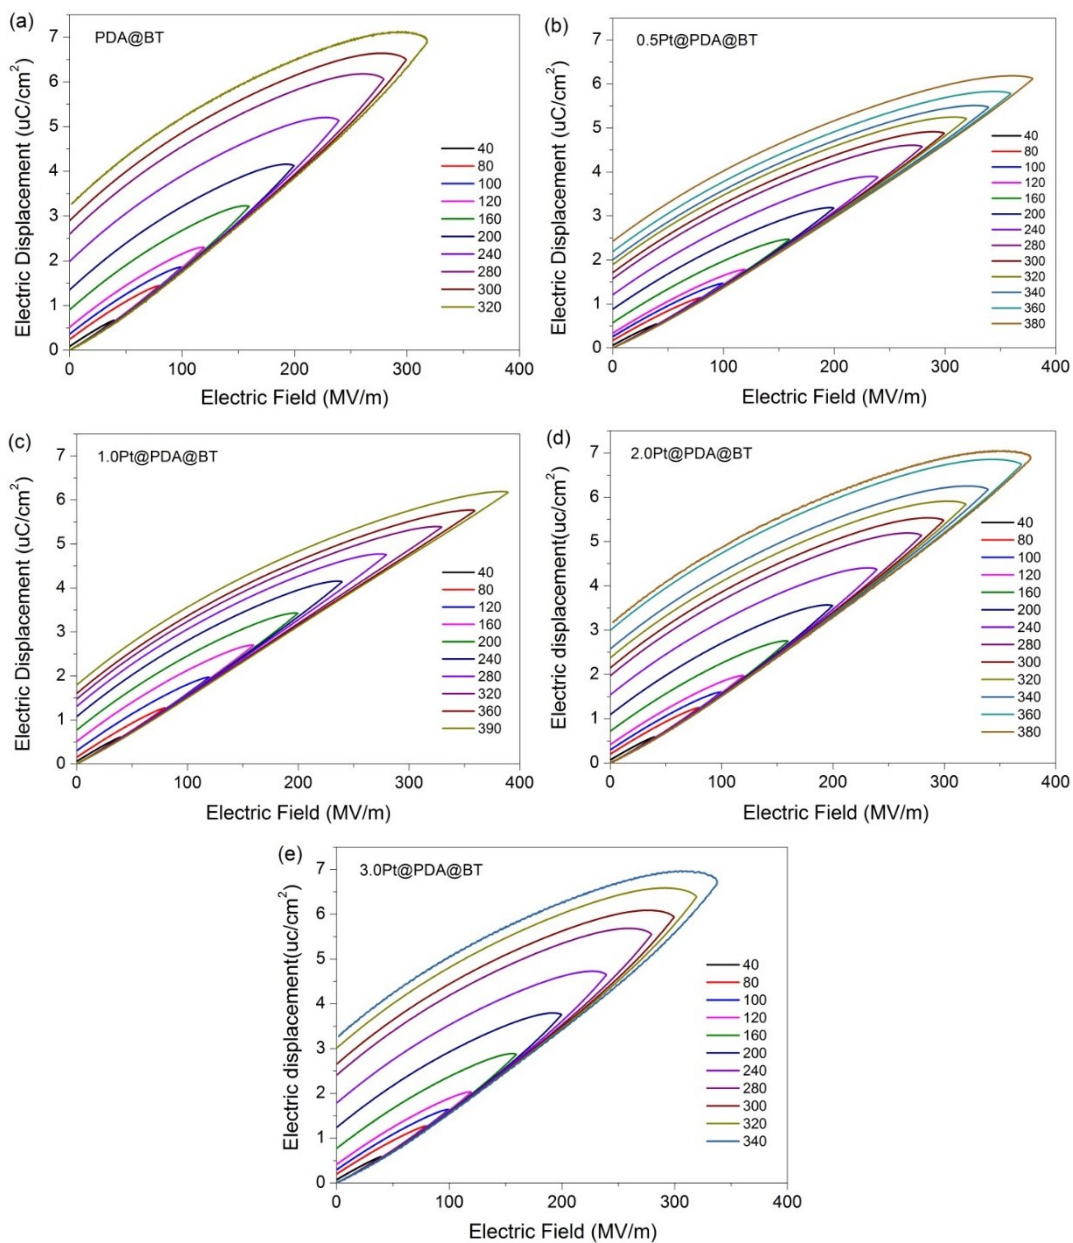

**Figure S6.** Unipolar D-E loops of the nanocomposites with PDA@BT (a), 0.5Pt@PDA@BT (b), 1.0Pt@PDA@BT (c), 2.0Pt@PDA@BT (d), and 3.0Pt@PDA@BT (e);

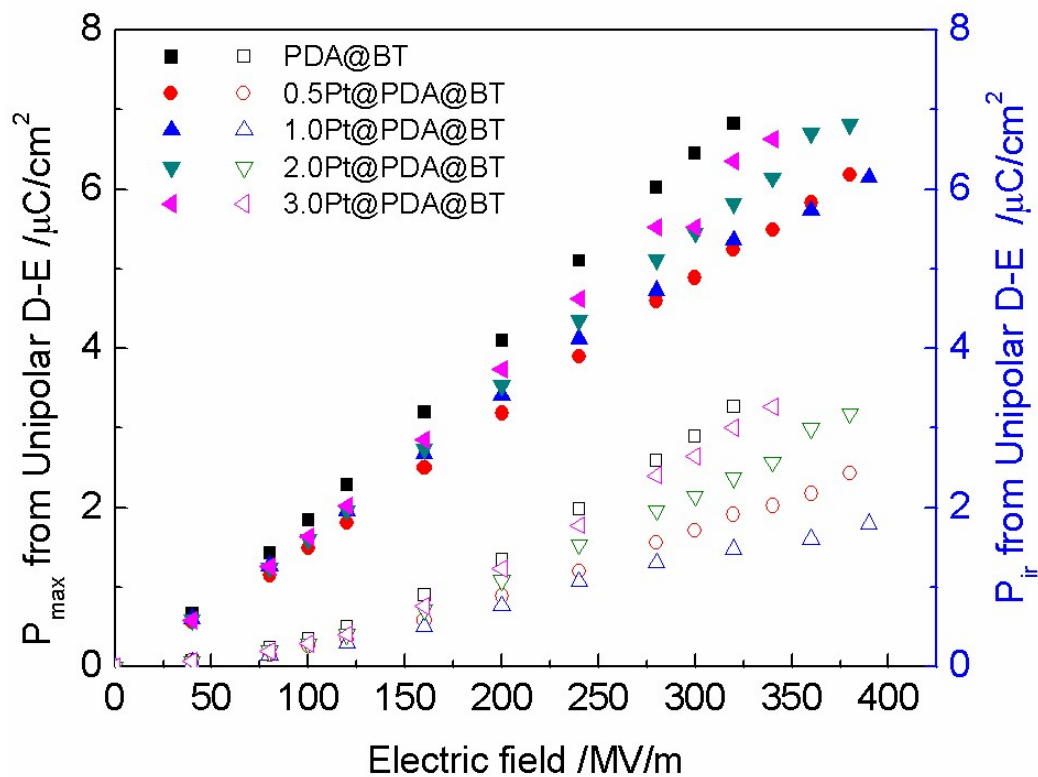

**Figure S7.** Electric field dependent electric displacement at both maximum field (referring to  $P_{\max}$  from unipolar D-E loops of the nanocomposites) and zero electric field (referring to the irreversible polarization  $P_{\text{ir}}$  from unipolar D-E loops of the nanocomposites).



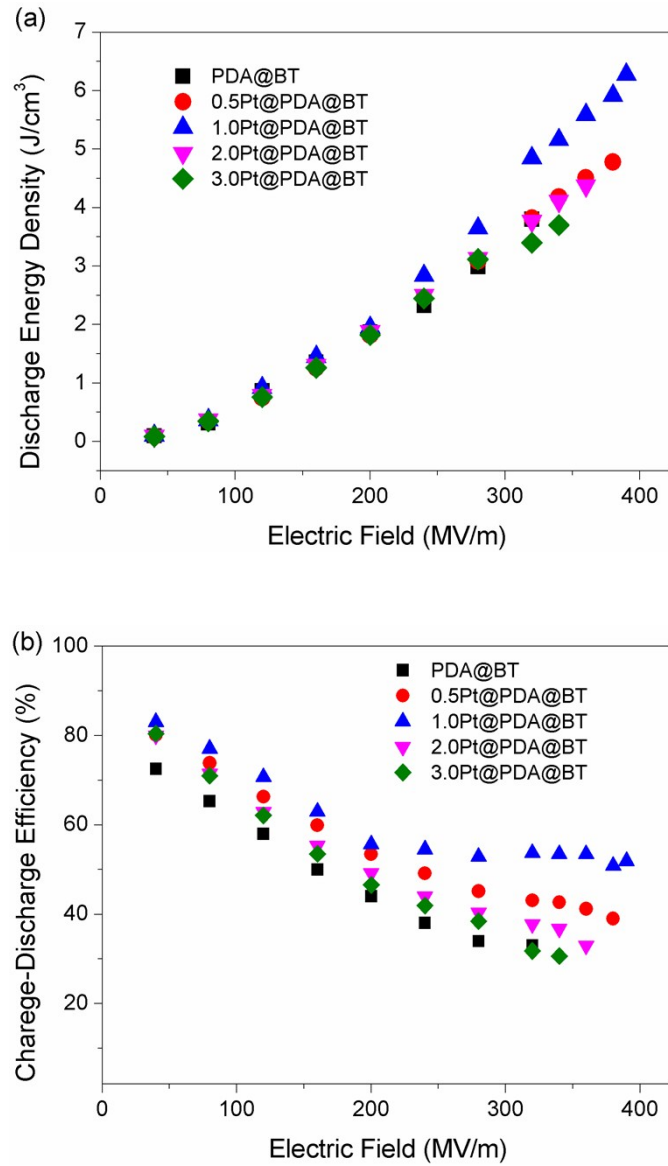

**Figure S8.** The discharged energy density and charge-discharge efficiency of the PDA@BT and Pt@PDA@BT nanocomposites.

**Table S1.** The calculated results according to Equation 2 when  $d = 10 \mu\text{m}$

| The radius of nano-pt<br>Calculation Results   | r=1nm                  | r=2nm                  | r=3nm                  |
|------------------------------------------------|------------------------|------------------------|------------------------|
| $2\pi\epsilon_0\epsilon\sqrt{(d^2 - 4r^2)}$    | $6.68 \times 10^{-15}$ | $6.68 \times 10^{-15}$ | $6.68 \times 10^{-15}$ |
| $\text{arccosh}(d/2r)$                         | 9.21                   | 8.52                   | 8.11                   |
| $\text{coth}\{(j+1/2)\text{arccosh}(d/2r)\}-1$ | 0.0002                 | 0.0004                 | 0.0006                 |
| Capacitance C /aF                              | 1.3351                 | 2.6703                 | 4.0066                 |
| $e^2/2C / \times 10^{-24} \text{ J}$           | 9.6132                 | 4.8066                 | 3.2035                 |
| $T\{(e^2/2C)/k_b\} /k$                         | 696.28                 | 348.14                 | 232.02                 |

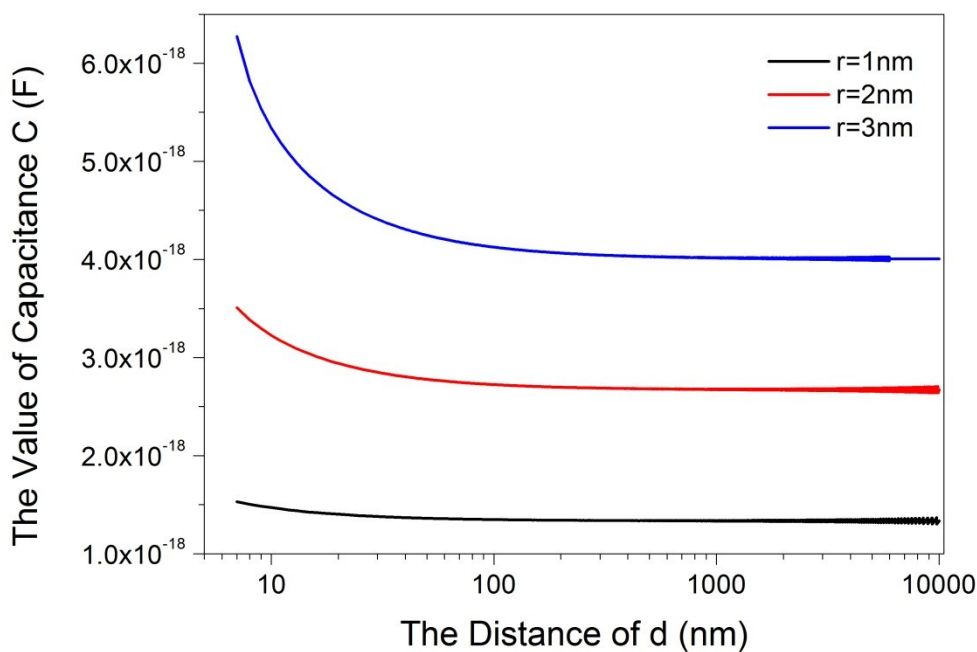

**Figure S9.** The value of the capacitance C with the change of distance of d

According to the calculation results, one can see that the value of C is almost proportional to the radius of nanoparticles but almost independent on the distance of d. When  $r = 1\text{nm}$ , the corresponding estimate of  $e^2/2C \approx 9.6132 \times 10^{-24} \text{ J}$ , the temperature is about 696.28 K. So, the effect of Coulomb blockade can occur theoretically at room temperature.
